# Supplementary material for: Combined Adipose Tissue-Derived Mesenchymal Stem Cell Therapy and Rehabilitation in Experimental Stroke
Source: PubMed Central journal article supplement (PMC6443824; doi:10.3389/fneur.2019.00235), 2019-03-26
Supplement: Table_1.pdf [file Table_1.pdf]

**SUPPLEMENTAL TABLE 1 | Body weight (g).**

|                            | <b>Day 0</b> | <b>Day 3</b> | <b>Day 7</b> | <b>Day 21</b> | <b>Day 42</b> |
|----------------------------|--------------|--------------|--------------|---------------|---------------|
| <b>SHAM+V+S</b><br>(n=8)   | 310.3±16.1   | 300.6±17.4   | 314.0±14.6   | 360.4±18.6    | 392.4±20.7    |
| <b>SHAM+C+S</b><br>(n=8)   | 309.3±18.3   | 297.4±19.3   | 317.1±20.7   | 360.4±31.6    | 392.6±52.8    |
| <b>SHAM+V+EE</b><br>(n=8)  | 303.5±14.3   | 294.8±11.5   | 309.3±12.4   | 345.3±18.7    | 379.0±19.6    |
| <b>SHAM+C+EE</b><br>(n=8)  | 308.6±14.3   | 301.3±10.6   | 318.6±9.2    | 362.4±13.8    | 398.1±16.6    |
| <b>MCAO+V+S</b><br>(n=12)  | 312.9±20.6   | 299.8±19.0   | 316.8±18.9   | 362.4±23.8    | 400.2±37.4    |
| <b>MCAO+C+S</b><br>(n=10)  | 302.7±16.5   | 292.4±19.0   | 307.7±19.1   | 353.5±22.3    | 389.8±31.3    |
| <b>MCAO+V+EE</b><br>(n=10) | 300.2±13.0   | 286.6±14.9   | 303.5±15.3   | 343.8±21.6    | 374.4±27.0    |
| <b>MCAO+C+EE</b><br>(n=11) | 297.6±6.0    | 287.3±7.0    | 299.7±19.2   | 345.3±15.3    | 385.1±17.6    |
| <b>MCAO+V7+EE</b><br>(n=8) | 308.6±13.7   | 299.6±11.5   | 317.9±12.7   | 364.3±18.8    | 402.0±21.8    |
| <b>MCAO+C7+EE</b><br>(n=7) | 300.1±11.5   | 294.1±12.8   | 307.9±13.6   | 345.9±18.9    | 374.0±27.2    |

SHAM=sham-operated; MCAO=middle cerebral artery occlusion; V=2 d vehicle; C=2 d cell infusion; V7=7 d vehicle; C7=7 d cell infusion; S=standard housing; EE=enriched environment.
