# Supplementary material for: Combined Adipose Tissue-Derived Mesenchymal Stem Cell Therapy and Rehabilitation in Experimental Stroke
Source: PubMed Central journal article supplement (PMC6443824; doi:10.3389/fneur.2019.00235), 2019-03-26
Supplement: Table_2.pdf [file Table_2.pdf]

**SUPPLEMENTAL TABLE 2 | Neurological scores.**

|                            | <b>Baseline</b> | <b>Day 1</b> | <b>Day 2</b> | <b>Day 3</b> | <b>Day 5</b> | <b>Day 7</b> | <b>Day 21</b> | <b>Day 42</b> |
|----------------------------|-----------------|--------------|--------------|--------------|--------------|--------------|---------------|---------------|
| <b>SHAM+V+S</b><br>(n=8)   | 0±0             | 0.3±0.5      | 0.4±0.5      | 0.6±1.2      | 0.3±0.7      | 0.3±0.7      | 0±0           | 0±0           |
| <b>SHAM+C+S</b><br>(n=8)   | 0±0             | 0±0          | 0±0          | 0±0          | 0±0          | 0±0          | 0±0           | 0±0           |
| <b>SHAM+V+EE</b><br>(n=8)  | 0±0             | 0.4±1.1      | 0±0          | 0±0          | 0±0          | 0±0          | 0±0           | 0±0           |
| <b>SHAM+C+EE</b><br>(n=8)  | 0±0             | 0.4±1.1      | 0.4±1.1      | 0.4±1.1      | 0.4±1.1      | 0±0          | 0±0           | 0±0           |
| <b>MCAO+V+S</b><br>(n=12)  | 0±0             | 1.4±0.9      | 1.7±1.0      | 1.6±1.1      | 1.3±1.1      | 1.3±1.2      | 1.2±1.0       | 0.5±0.9       |
| <b>MCAO+C+S</b><br>(n=10)  | 0±0             | 1.5±0.8      | 1.6±0.8      | 1.8±0.9      | 1.7±0.7      | 1.5±0.8      | 0.5±0.8       | 0.6±0.8       |
| <b>MCAO+V+EE</b><br>(n=10) | 0±0             | 1.4±0.7      | 1.6±0.7      | 1.2±0.8      | 1.6±1.0      | 1.7±0.8      | 1.3±1.1       | 0.9±1.0       |
| <b>MCAO+C+EE</b><br>(n=11) | 0±0             | 1.4±0.9      | 2.0±0.8      | 1.7±1.0      | 2.3±1.0      | 2.0±0.6      | 1.6±0.7       | 1.5±0.7       |
| <b>MCAO+V7+EE</b><br>(n=8) | 0±0             |              |              |              |              |              | 0.5±0.8       | 0.8±0.7       |
| <b>MCAO+C7+EE</b><br>(n=7) | 0±0             |              |              |              |              |              | 0.9±0.7       | 1.0±0.8       |

SHAM=sham-operated; MCAO=middle cerebral artery occlusion; V=2 d vehicle; C=2 d cell infusion; V7=7 d vehicle; C7=7 d cell infusion; S=standard housing; EE=enriched environment.
